# Supplementary material
Source: publisher figshare collection journal article supplement (https://acs.figshare.com/ndownloader/files/4161997)
Supplement: Supplementary file 1 [file 4161997]

**Supporting Information**

April 16, 2012

**Isolation of Template Effects that Control the Structure and Function of Non-spherical,  
Biotemplated Pd Nanomaterials**

Rohit Bhandari and Marc R. Knecht\*

(8 pages)

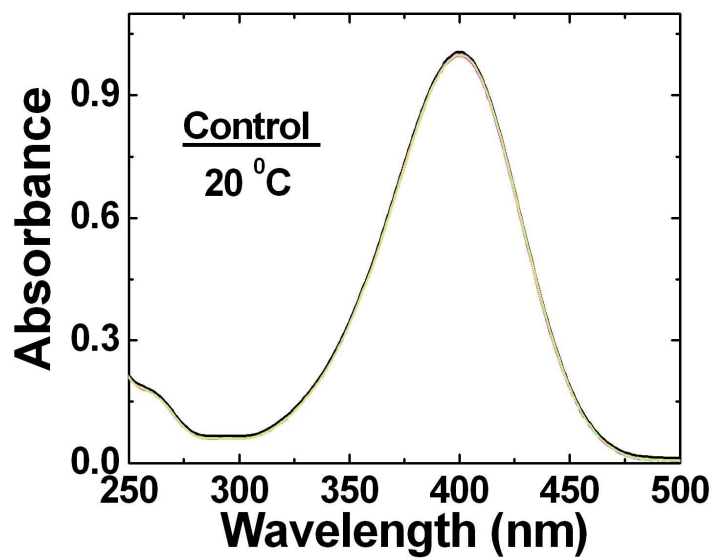

**Figure S1.** Time resolved UV-vis spectra for the reduction of 4-nitrophenol as a control experiment in the absence of Pd catalyst indicating no catalytic turnover for the reaction.

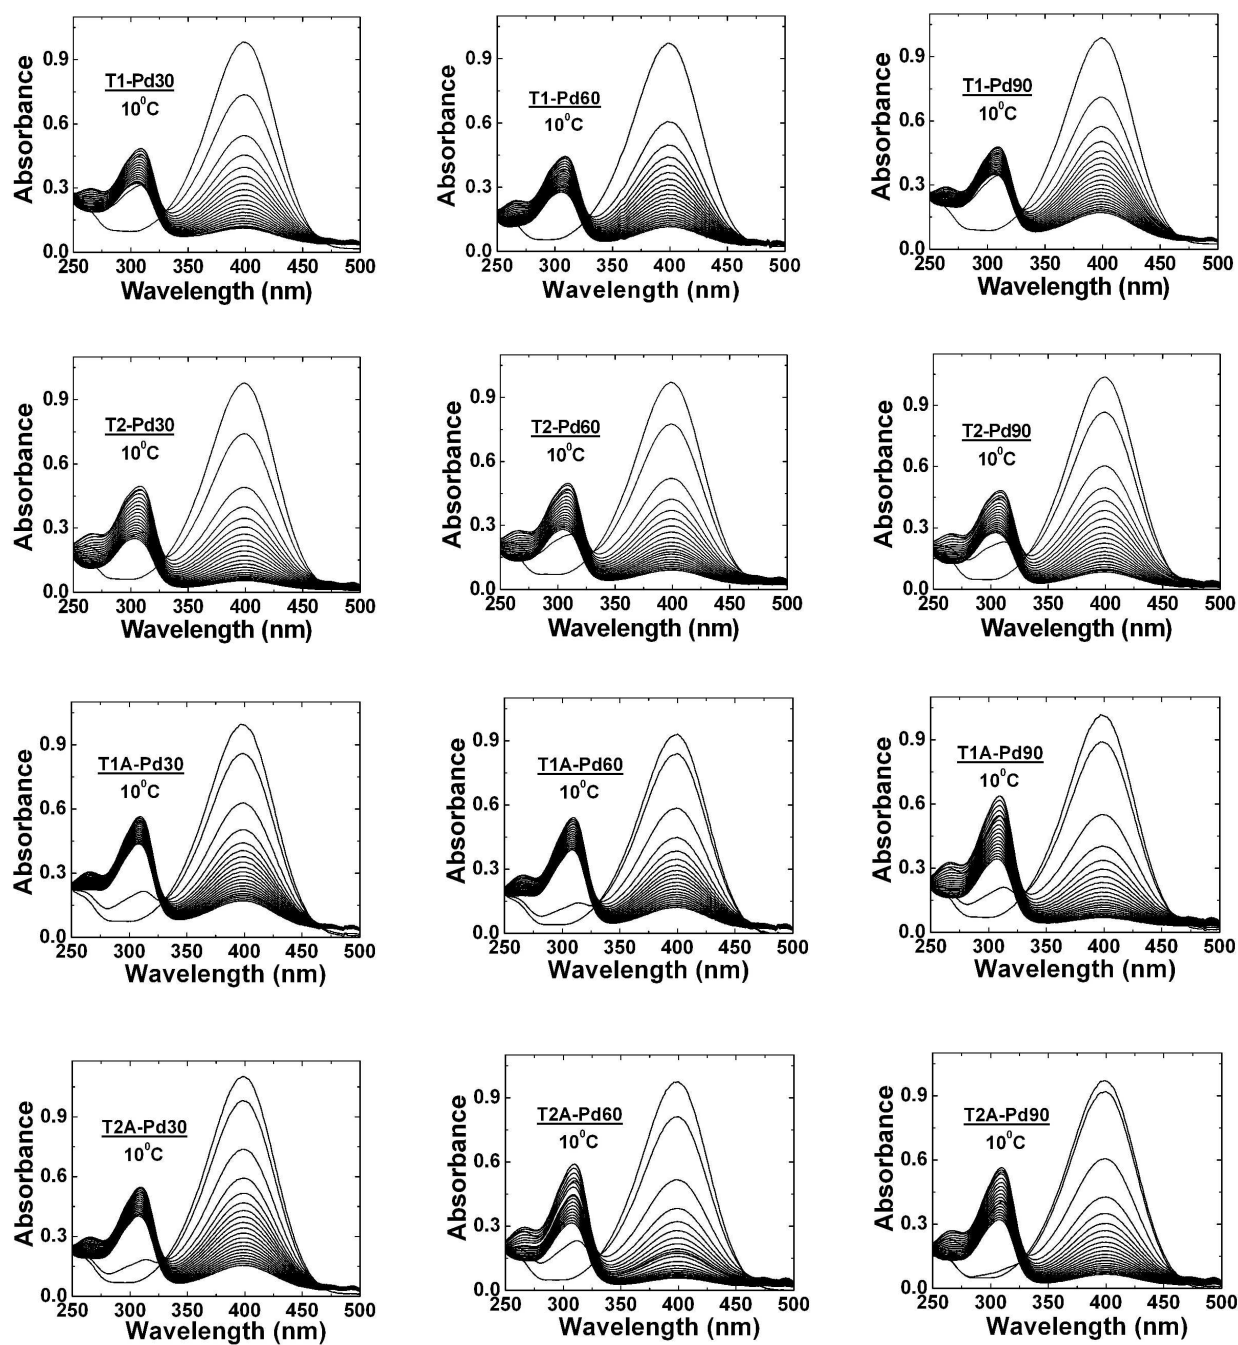

**Figure S2.** Kinetic analysis of the 4-nitrophenol reduction reaction at 10.0 °C employing all T1, T2, T1A, and T2A-encapsulated Pd nanocatalysts.

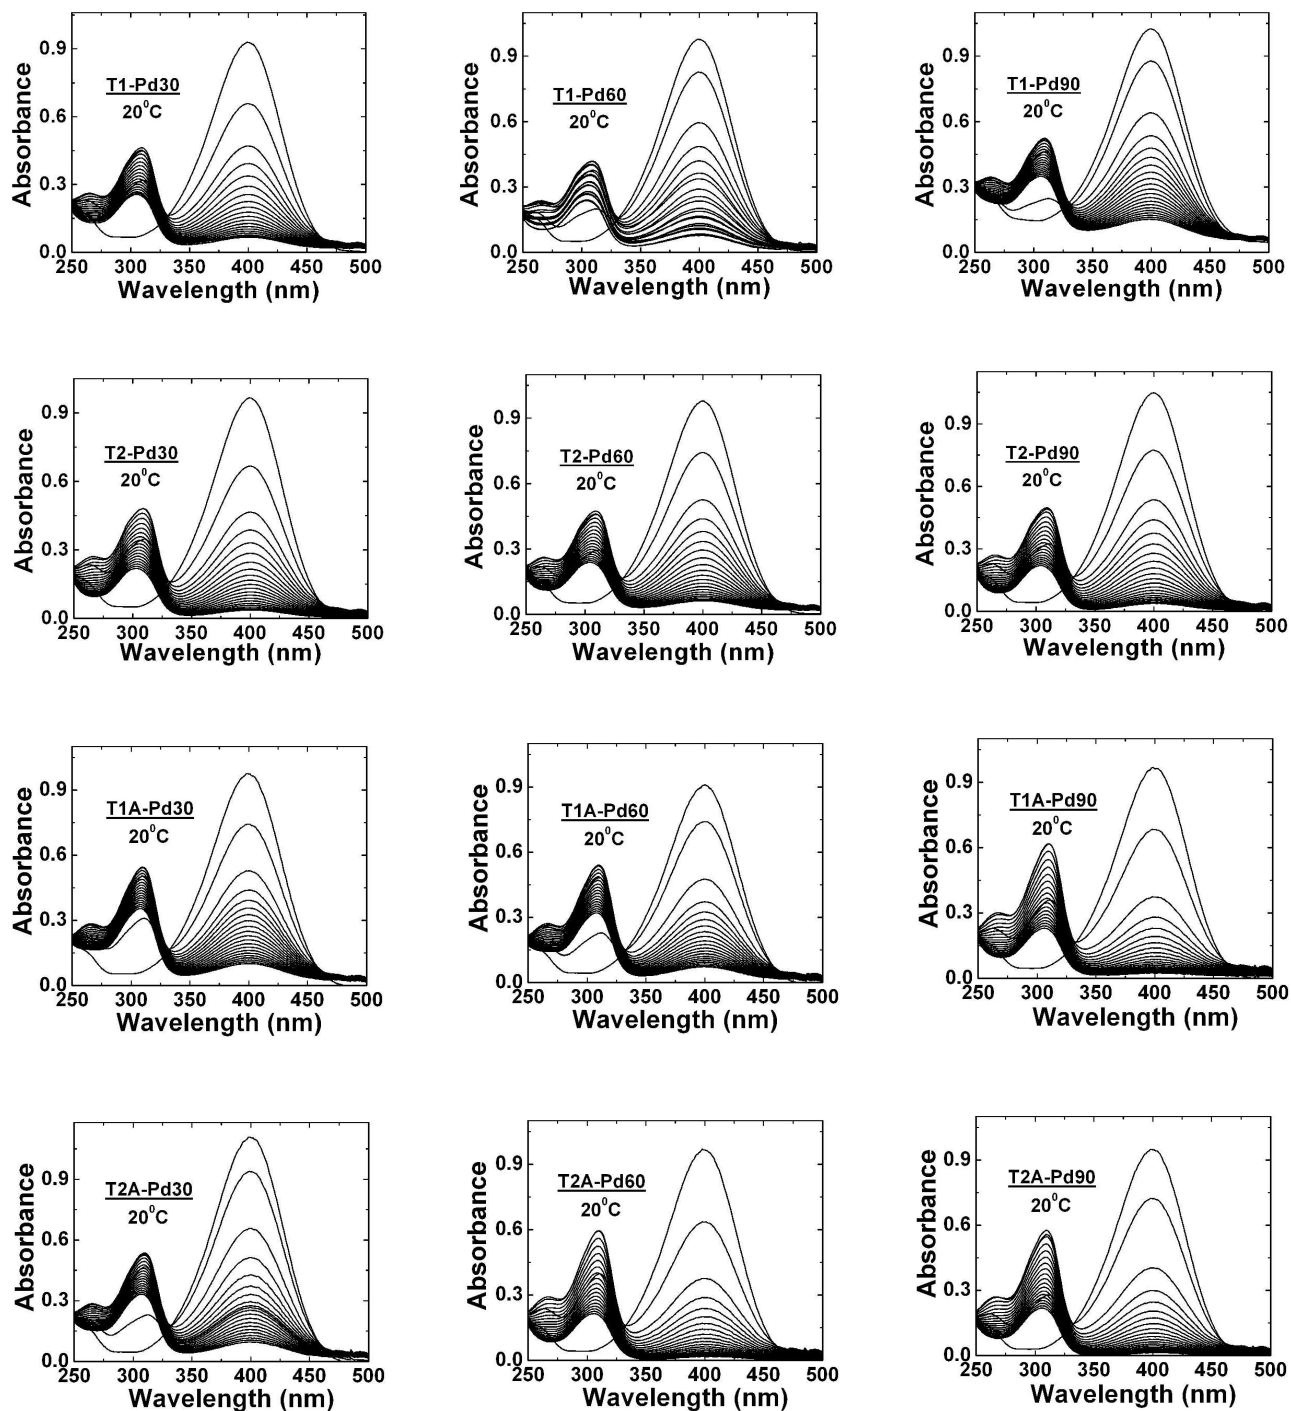

**Figure S3.** Kinetic analysis of the 4-nitrophenol reduction reaction at 20.0 °C employing all T1, T2, T1A, and T2A-encapsulated Pd nanocatalysts.

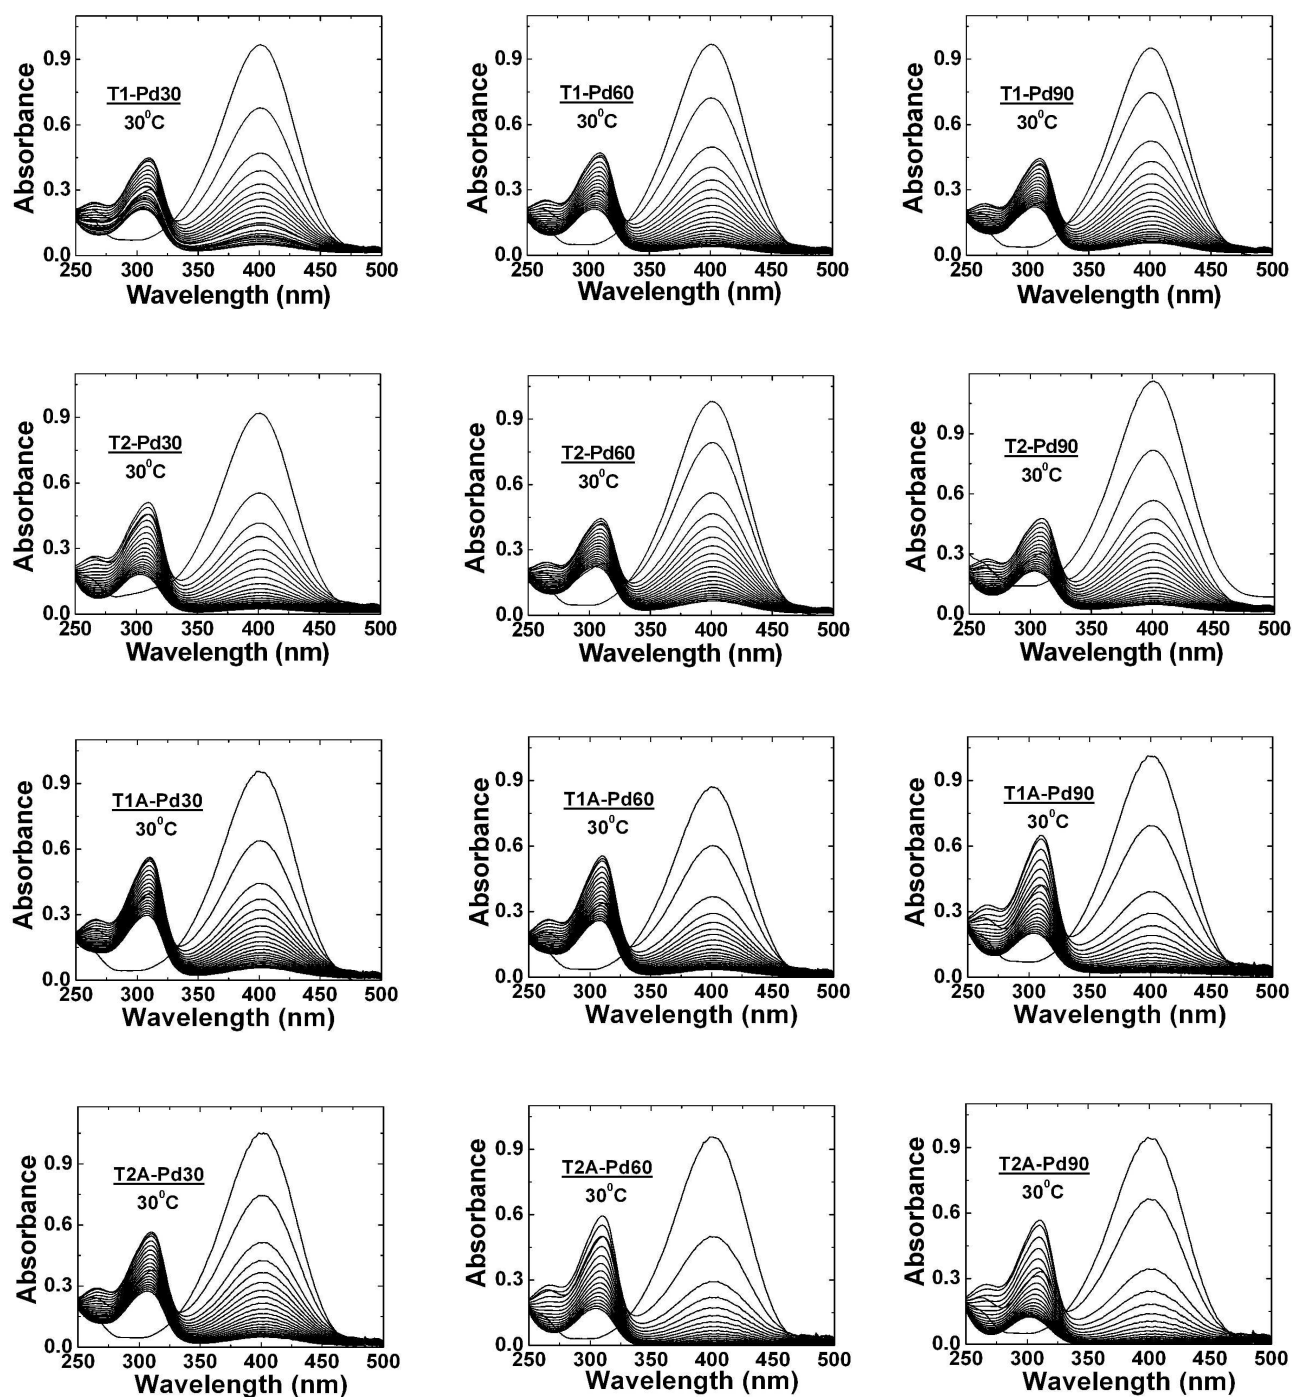

**Figure S4.** Kinetic analysis of the 4-nitrophenol reduction reaction at 30.0 °C employing all T1, T2, T1A, and T2A-encapsulated Pd nanocatalysts.

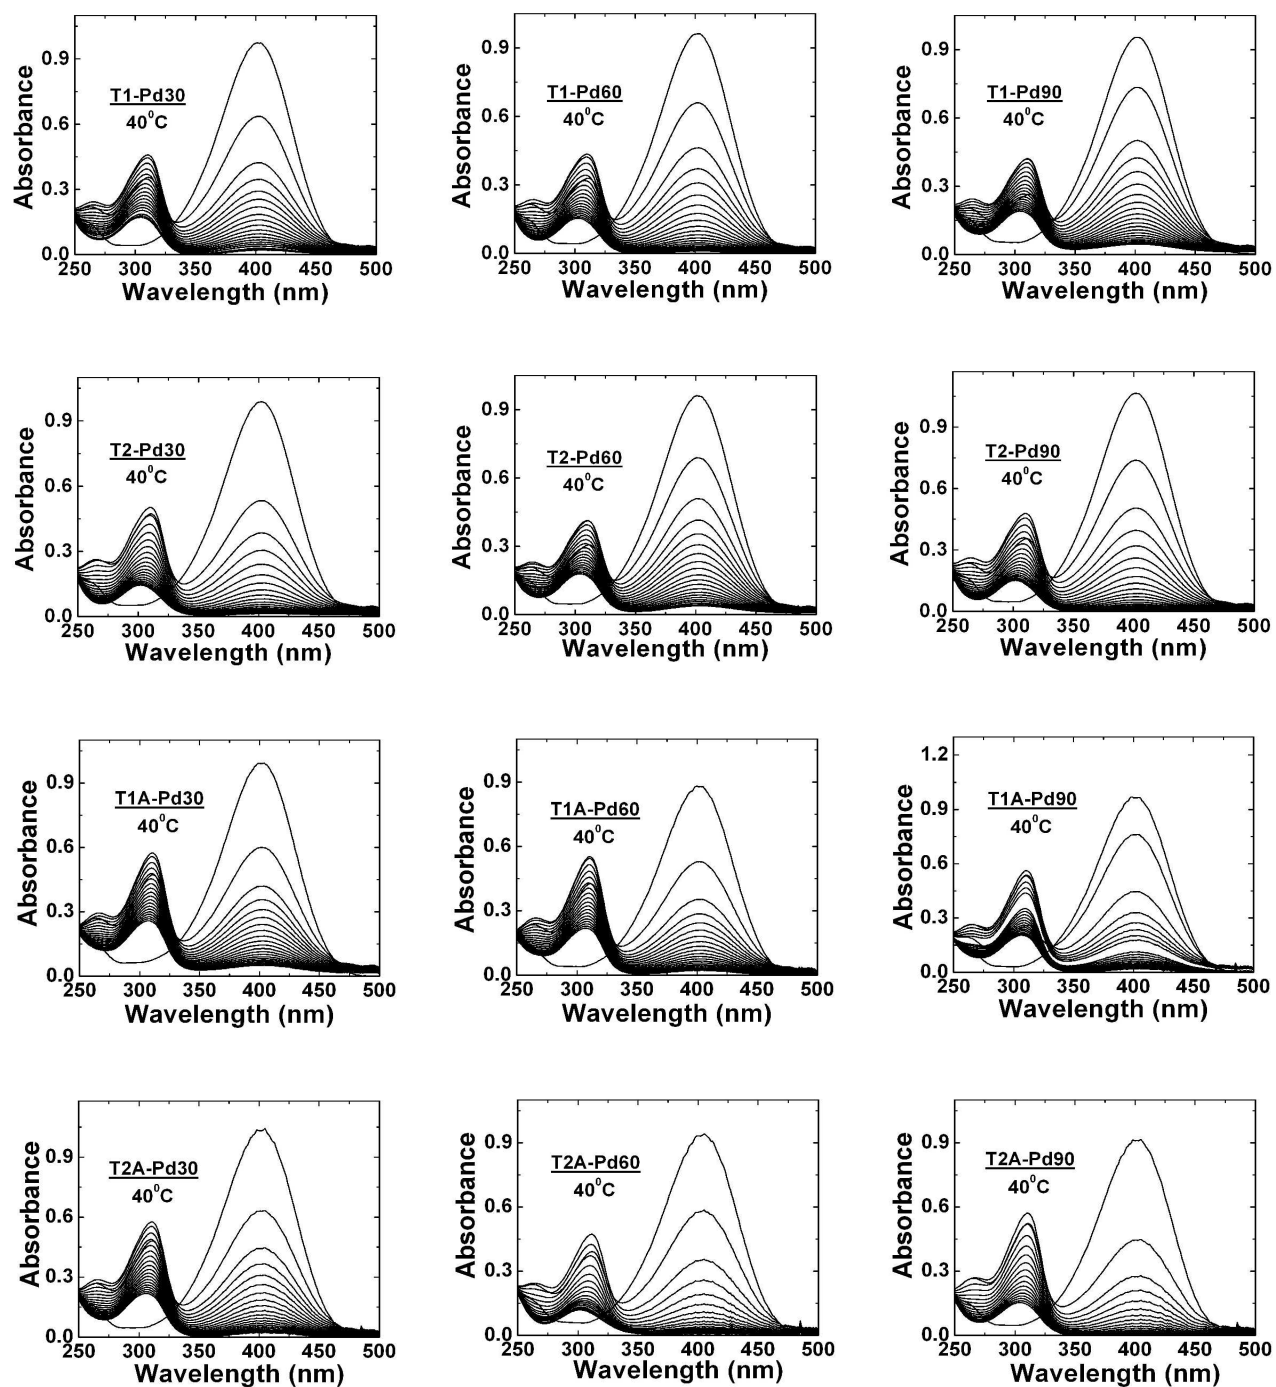

**Figure S5.** Kinetic analysis of the 4-nitrophenol reduction reaction at 40.0 °C employing all T1, T2, T1A, and T2A-encapsulated Pd nanocatalysts.

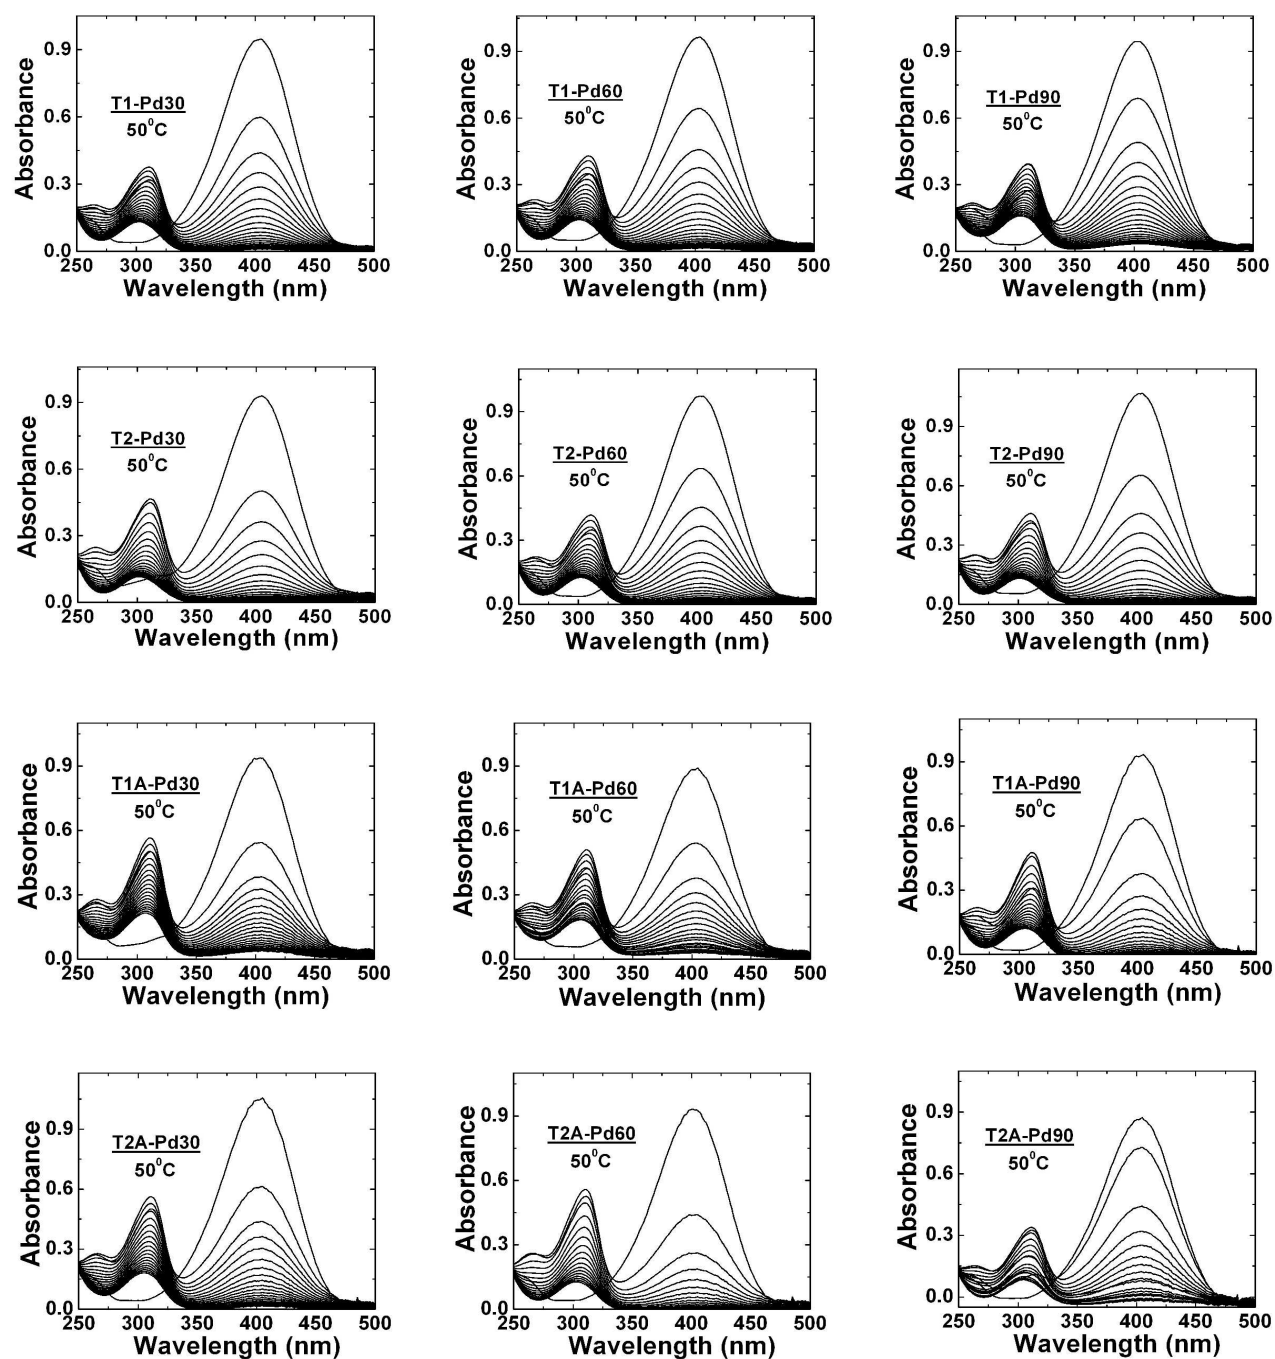

**Figure S6.** Kinetic analysis of the 4-nitrophenol reduction reaction at 50.0 °C employing all T1, T2, T1A, and T2A-encapsulated Pd nanocatalysts.

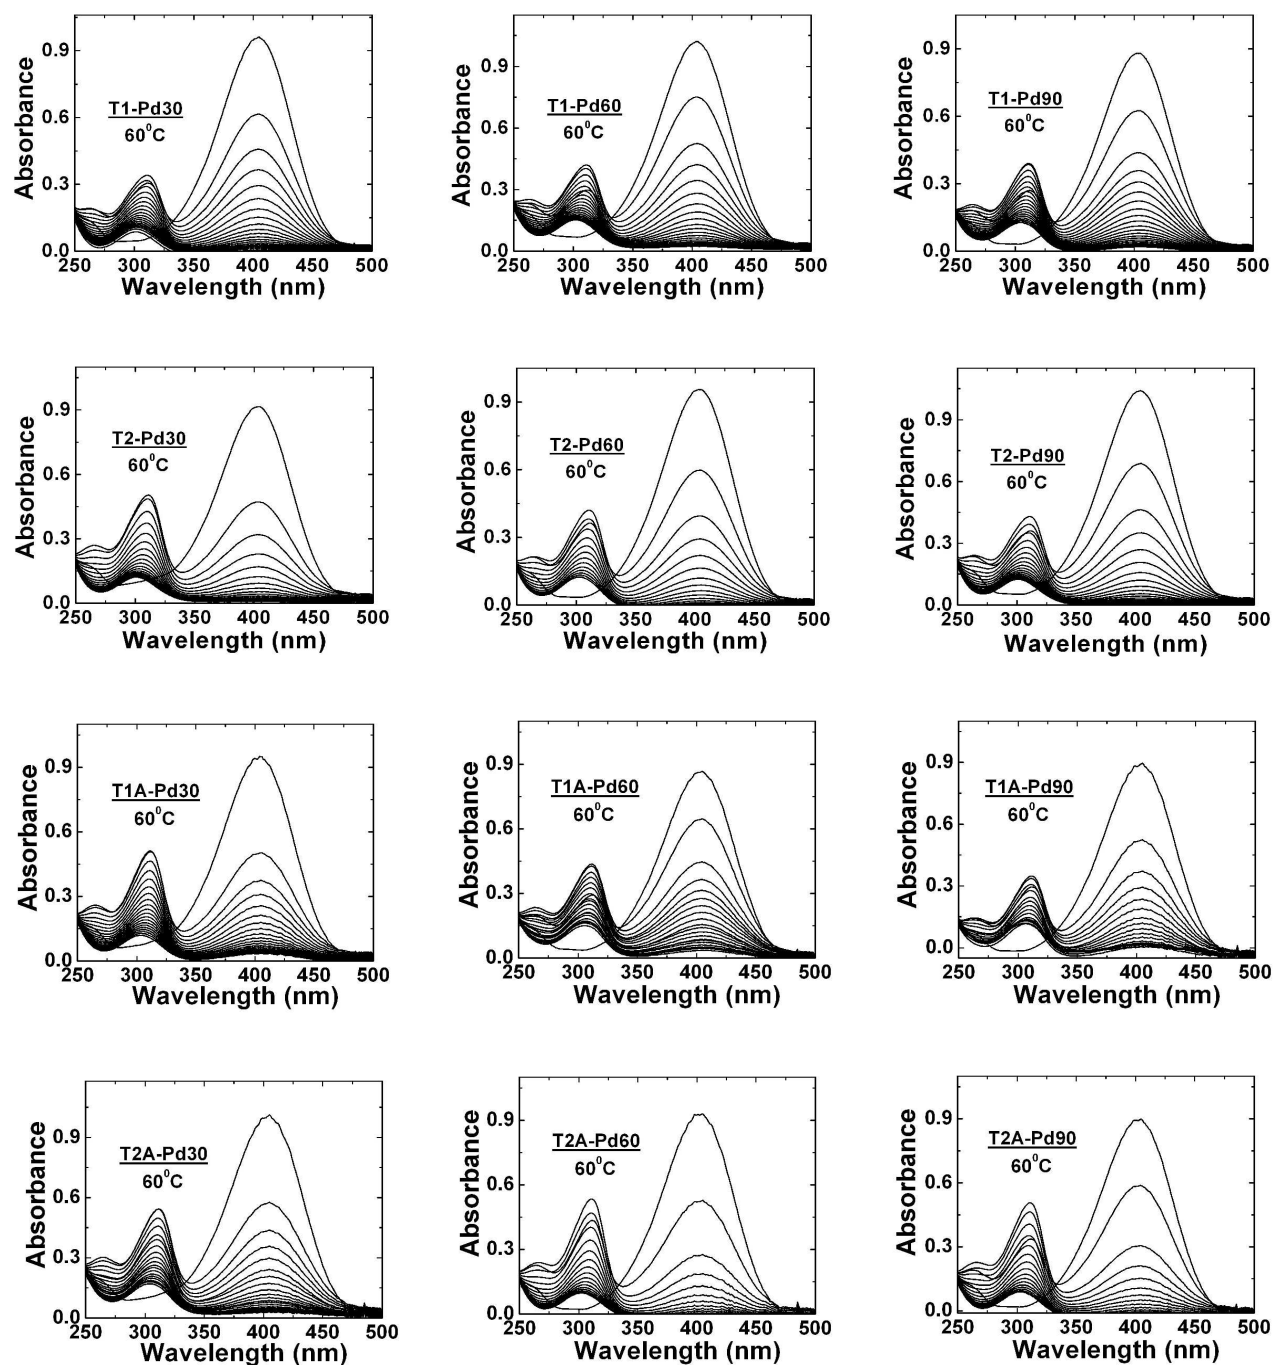

**Figure S7.** Kinetic analysis of the 4-nitrophenol reduction reaction at 60.0 °C employing all T1, T2, T1A, and T2A-encapsulated Pd nanocatalysts.
